# Supplementary material for: Development of potent CPP6–gemcitabine conjugates against human prostate cancer cell line (PC-3)
Source: Royal Society of Chemistry journal article supplement (doi:10.1039/c9md00489k), 2020-01-01
Supplement: c9md00489k1.pdf [file c9md00489k1.pdf]

# Supplementary Material

## Development of potent CPP6-gemcitabine conjugates against human prostate cancer cell line (PC-3)

Cristiana Correia<sup>a,b,c</sup>, Cristina P. R. Xavier<sup>b,c</sup>, Diana Duarte<sup>a,b,c</sup>, Abigail Ferreira<sup>a,d</sup>, Sara  
Moreira<sup>a,b,c</sup>, M. Helena Vasconcelos<sup>b,c,e</sup>, Nuno Vale<sup>a,b,c,f\*</sup>

<sup>a</sup>Laboratory of Pharmacology, Department of Drug Sciences, Faculty of Pharmacy, University of Porto, Rua de Jorge Viterbo Ferreira 228, 4050-313 Porto, Portugal

<sup>b</sup>Institute of Molecular Pathology and Immunology of the University of Porto (IPATIMUP), Rua Júlio Amaral de Carvalho, 45, 4200-135 Porto, Portugal

<sup>c</sup> Instituto de Investigação e Inovação em Saúde (i3S), University of Porto, Rua Alfredo Allen, 208, 4200-135 Porto, Portugal

<sup>d</sup> LAQV/REQUIMTE, Department of Chemical Sciences, Faculty of Pharmacy, University of Porto, Rua de Jorge Viterbo Ferreira 228, 4050-313 Porto, Portugal

<sup>e</sup> Laboratory of Microbiology, Department of Biological Sciences, Faculty of Pharmacy, University of Porto, Rua de Jorge Viterbo Ferreira, 228, 4050-313 Porto, Portugal

<sup>f</sup> Department of Molecular Pathology and Immunology, Abel Salazar Biomedical Sciences Institute (ICBAS), University of Porto, Rua de Jorge Viterbo Ferreira 228, 4050-313 Porto, Portugal

\* [nuno.vale@ff.up.pt](mailto:nuno.vale@ff.up.pt)

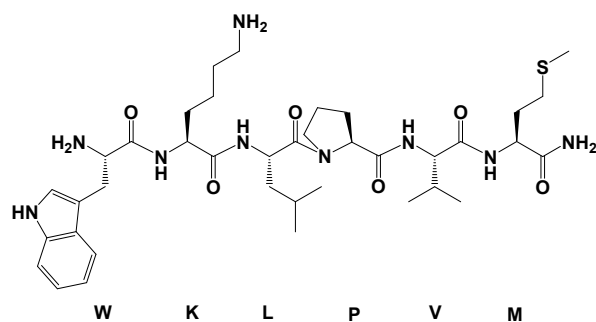

**Figure S1-** Chemical structure of CPP6-1.

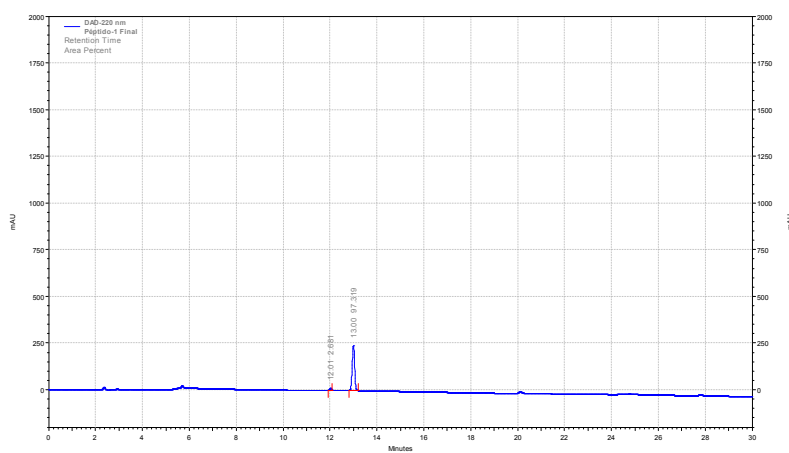

**Figure S2-** Chromatogram of the CPP6-1 after purification, acquired with a HPLC-DAD system, with a C18 column, using ACN in water with 0.05% TFA as eluent, in gradient mode (0 - 100%), for 30 minutes, at a flow of 1 mL/min and detection at  $\lambda = 220$  nm.

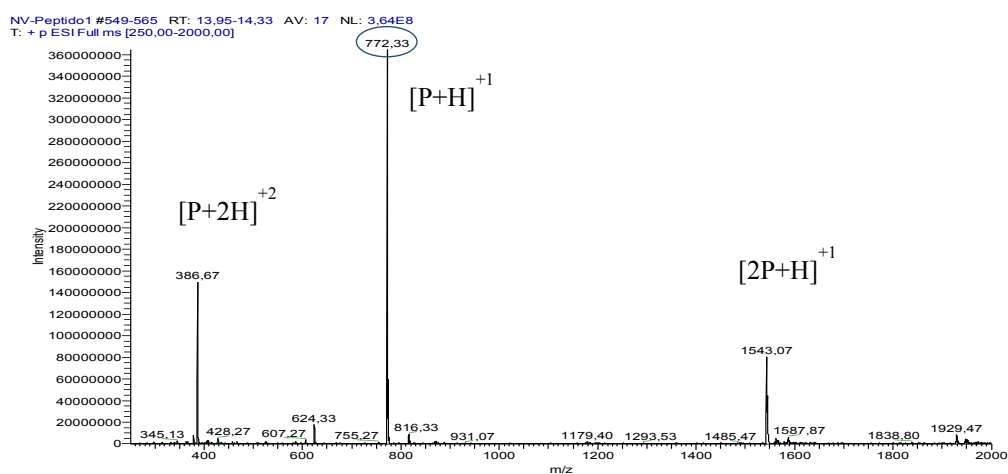

**Figure S3-** Mass spectrum (LC-ESI/MS Orbitrap, positive mode) of the major peak of the LC-MS chromatogram (data not shown) of CPP6-1.

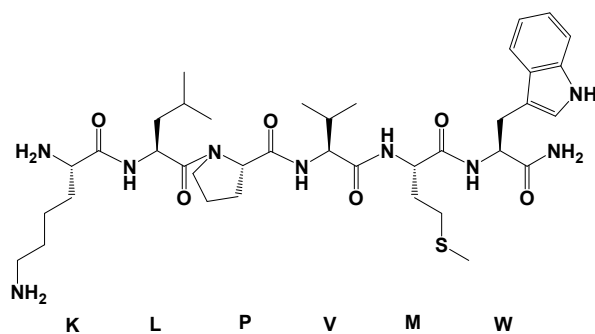

**Figure S4-** Chemical structure of CPP6-2.

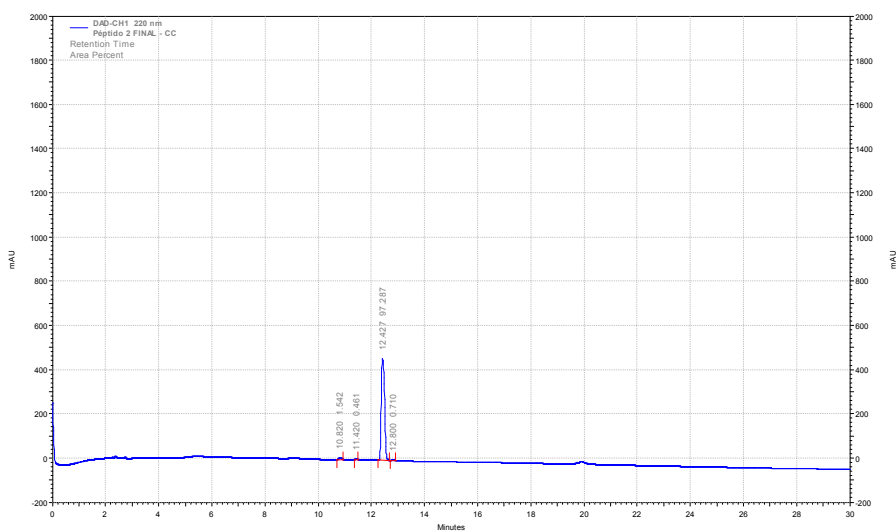

**Figure S5** - Chromatogram of the CPP6-2 after purification, acquired with a HPLC-DAD system, with a C18 column, using ACN in water with 0.05% TFA as eluent, in gradient mode (0 - 100%), for 30 minutes, at a flow of 1 mL/min and detection at  $\lambda = 220$  nm.

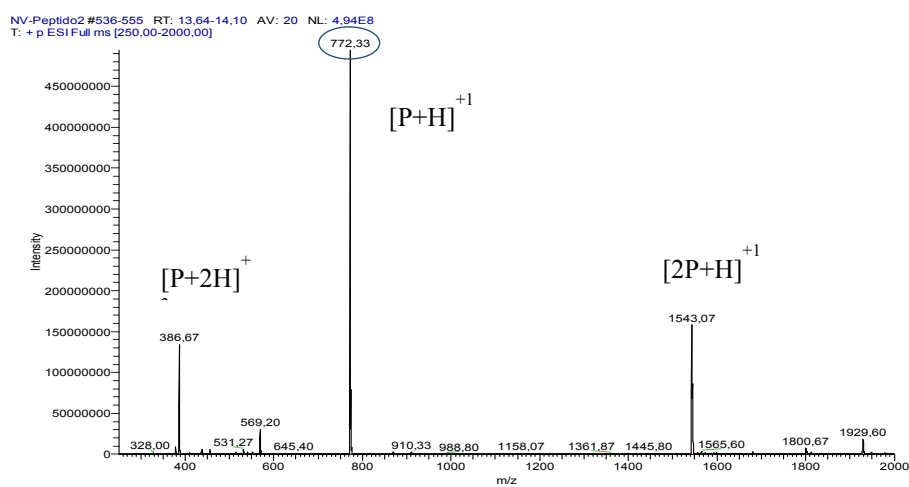

**Figure S6** - Mass spectrum (LC-ESI/MS Orbitrap, positive mode) of the major peak of the LC-MS chromatogram (data not shown) of CPP6-2.

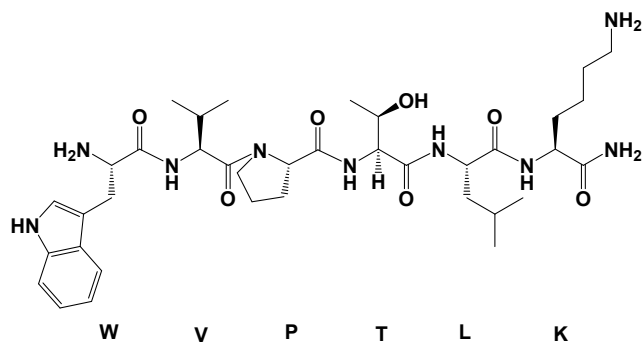

**Figure S7-** Chemical structure of CPP6-3.

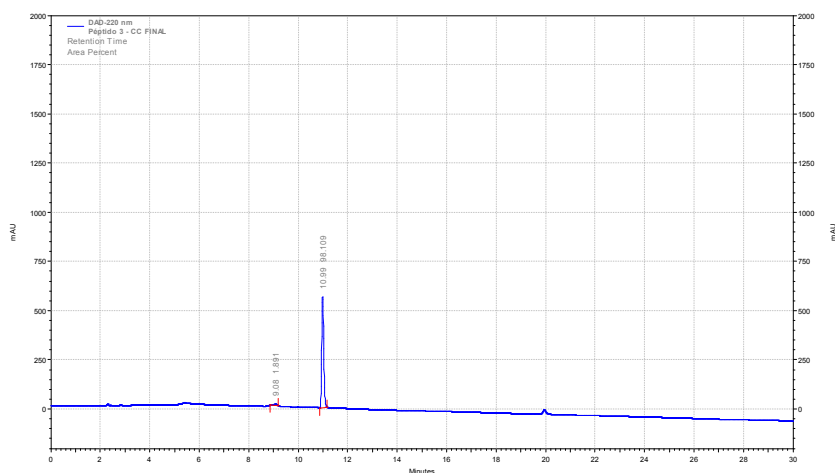

**Figure S8 -** Chromatogram of the CPP6-3 after purification, acquired with a HPLC-DAD system, with a C18 column, using ACN in water with 0.05% TFA as eluent, in gradient mode (0 - 100%), for 30 minutes, at a flow of 1 mL/min and detection at  $\lambda = 220$  nm.

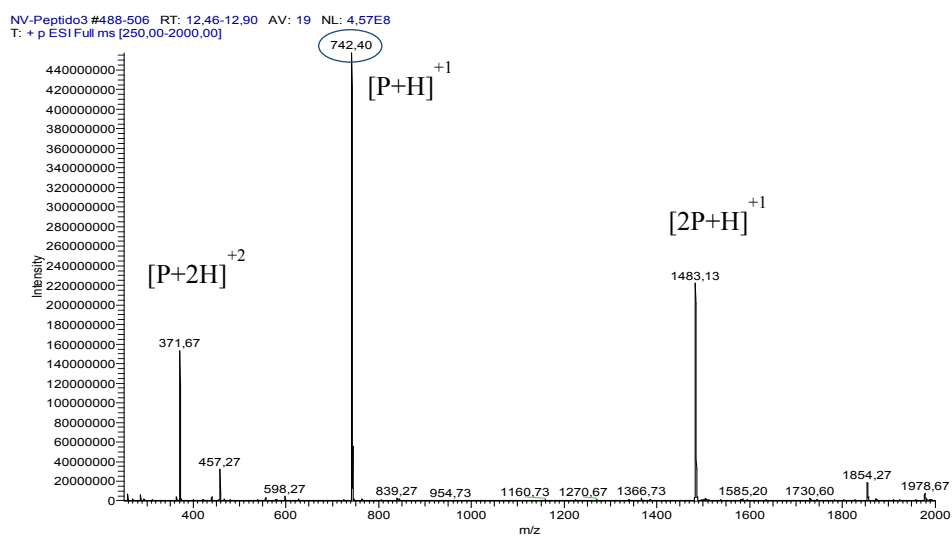

**Figure S9 -** Mass spectrum (LC-ESI/MS Orbitrap, positive mode) of the major peak of the LC-MS chromatogram (data not shown) of CPP6-3.

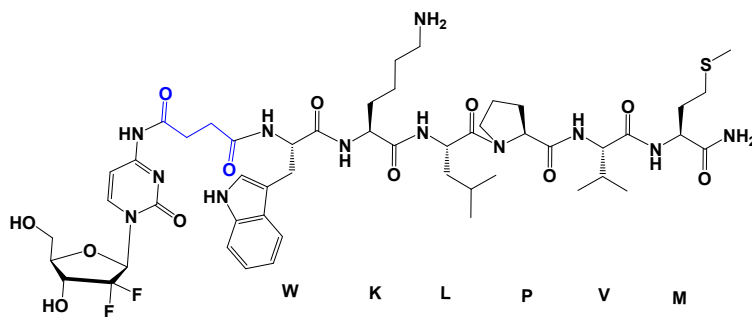

**Figure S10** - Chemical structure of Gem-C2-CPP6-1 conjugate.

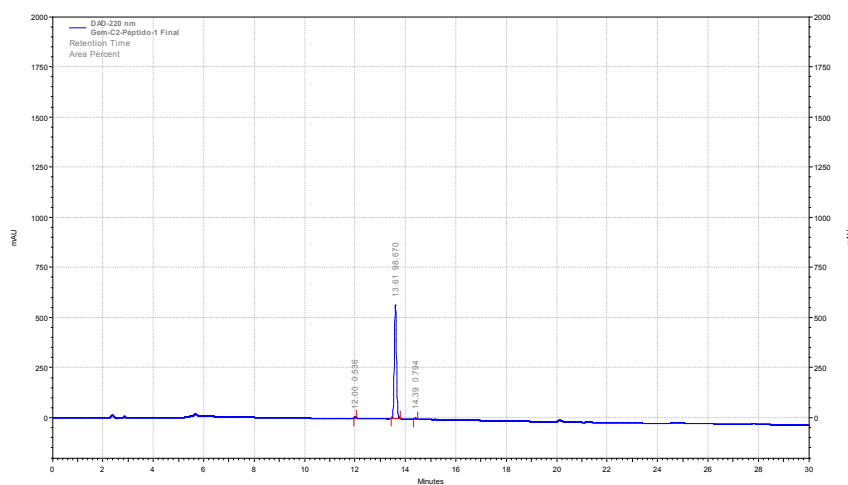

**Figure S11** - Chromatogram of the Gem-C2-CPP6-1 conjugate after purification, acquired with a HPLC-DAD system, with a C18 column, using ACN in water with 0.05% TFA as eluent, in gradient mode (0 - 100%), for 30 minutes, at a flow of 1 mL/min and detection at  $\lambda = 220$  nm.

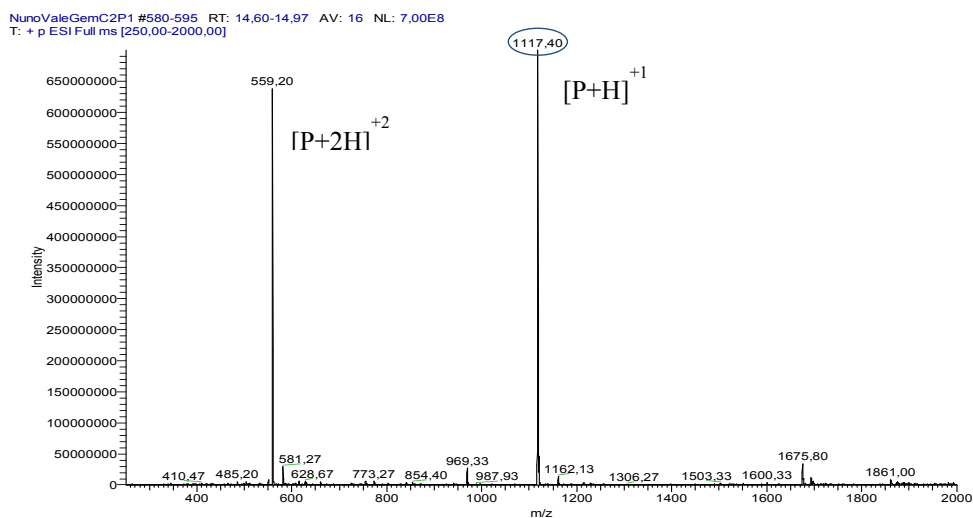

**Figure S12** - Mass spectrum (LC-ESI/MS Orbitrap, positive mode) of the major peak of the LC-MS chromatogram (data not shown) of Gem-C2-CPP6-1.

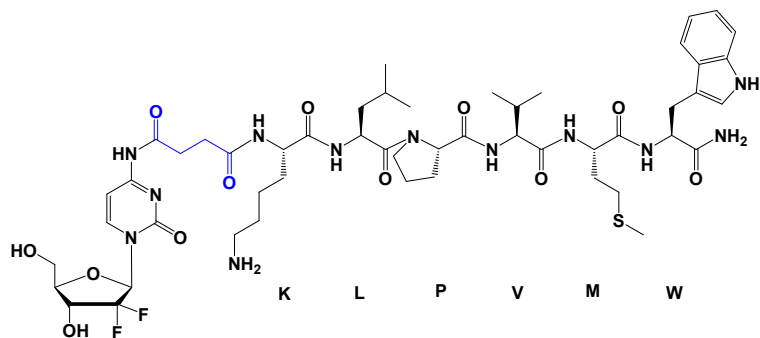

**Figure S13** - Chemical structure of Gem-C2-CPP6-2 conjugate.

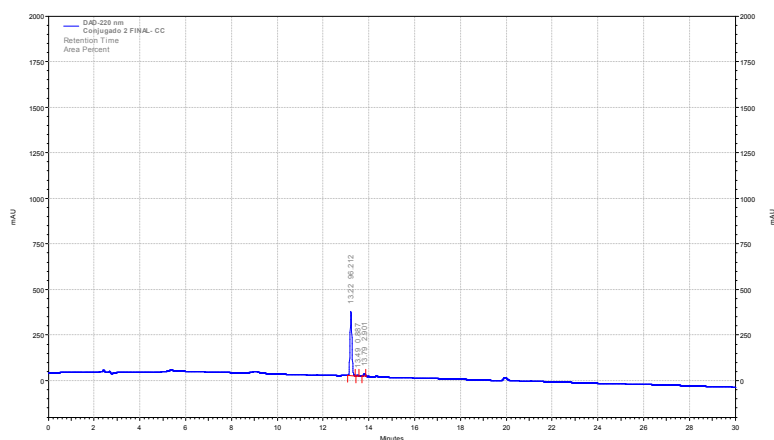

**Figure S14** - Chromatogram of the Gem-C2-CPP6-2 conjugate after purification, acquired with a HPLC-DAD system, with a C18 column, using ACN in water with 0.05% TFA as eluent, in gradient mode (0 - 100%), for 30 minutes, at a flow of 1 mL/min and detection at  $\lambda = 220$  nm.

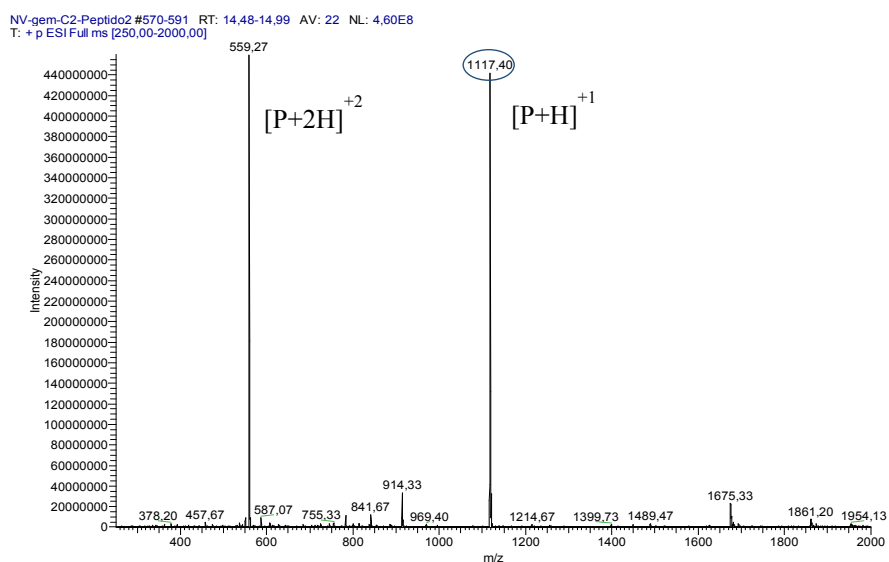

**Figure S15** - Mass spectrum (LC-ESI/MS Orbitrap, positive mode) of the major peak of the LC-MS chromatogram (data not shown), of Gem-C2-CPP6-2.

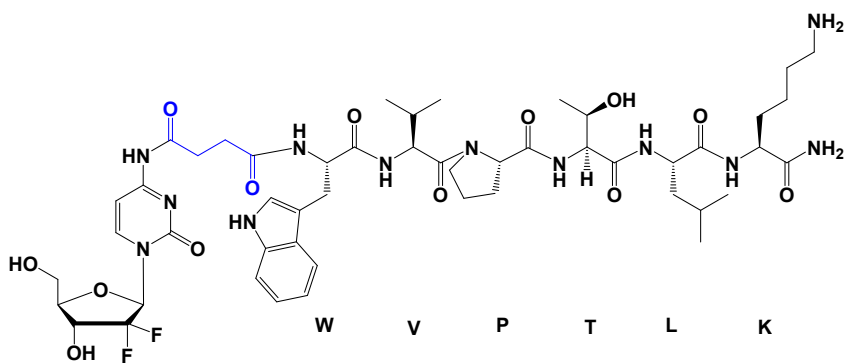

**Figure S16** - Chemical structure of Gem-C2-CPP6-2 conjugate.

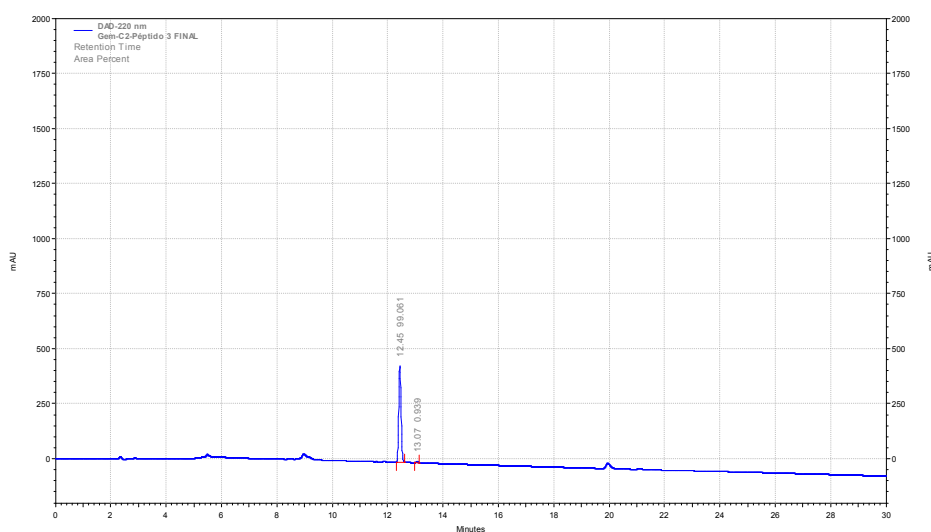

**Figure S17** - Chromatogram of the Gem-C2-CPP6-3 conjugate after purification, acquired with a HPLC-DAD system, with a C18 column, using ACN in water with 0.05% TFA as eluent, in gradient mode (0 - 100%), for 30 minutes, at a flow of 1 mL/min and detection at  $\lambda = 220$  nm.

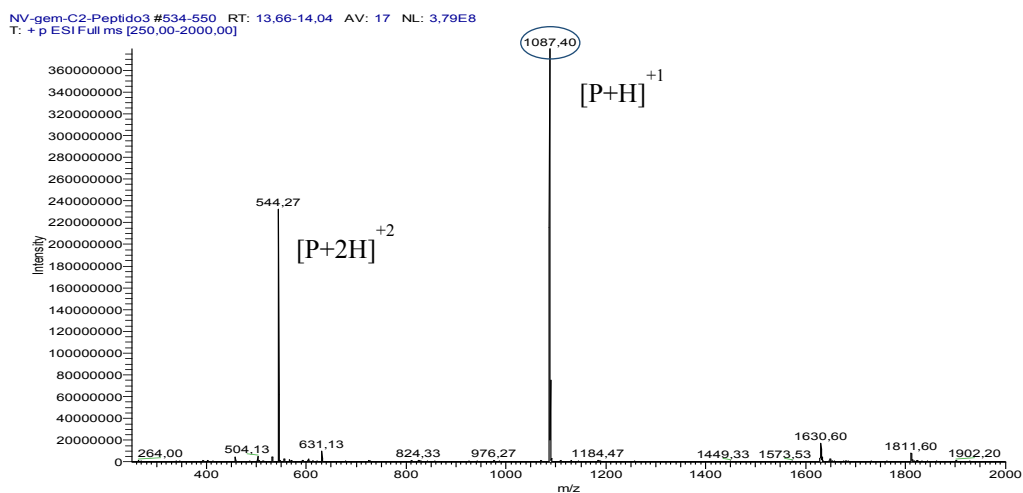

**Figure S18** - Mass spectrum (LC-ESI/MS Orbitrap, positive mode) of the major peak of the LC-MS chromatogram (data not shown) of Gem-C2-CPP6-3.

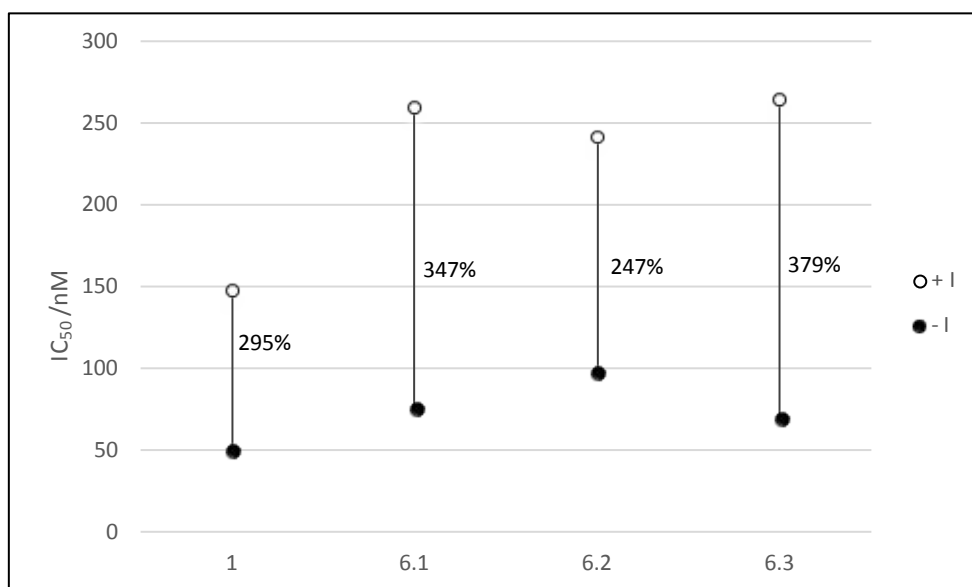

**Figure S19.** IC<sub>50</sub> of dFdC and conjugates with or without the presence of the inhibitor NBMPR in BxPC-3 cells: percentage of variation between the two values for each compound. +I: with inhibitor; -I: without inhibitor.

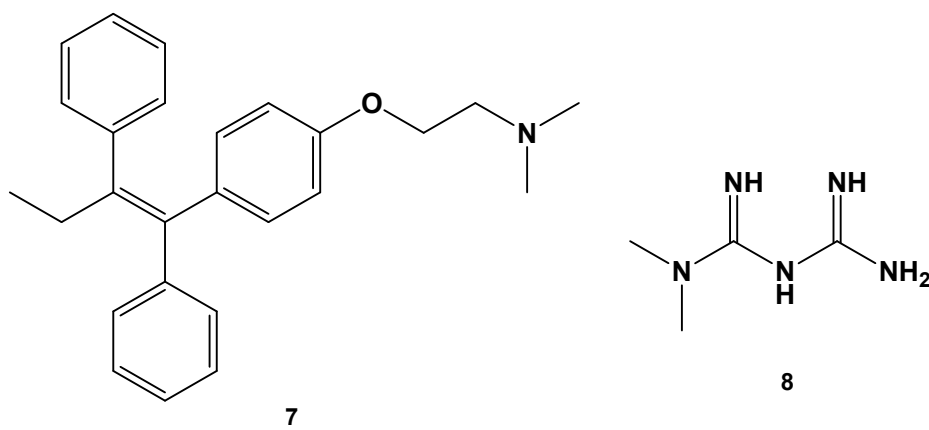

**Figure S20.** Chemical structures of drugs tamoxifen (7) and metformin (8)



**Table S1.** Molecular properties such as the molecular weight (MW), hydrophobicity parameter logP, lipophilicity parameter logD, and the total polar surface area (TPSA) for peptides **4** and **6**. For all CPP6 and dFdC-CPP6: Number of residue, 6; Extension coefficient ( $M^{-1}cm^{-1}$ ), 5690; isoelectric-point, 14 and net charge at pH 7 is +2 for all peptides **4** and **6**. (Calculated using GastroPlus™ Software)

| #          | Compound                  | Sequence                                     | MW/gmol <sup>-1</sup> | logP | logD  | T_PSA  |
|------------|---------------------------|----------------------------------------------|-----------------------|------|-------|--------|
| <b>4.1</b> | CPP6-1                    | KLPVMW                                       | 772.02                | 1.94 | 0.65  | 247.63 |
| <b>4.2</b> | CPP6-2                    | KLPVMW                                       | 772.02                | 2.01 | 0.59  | 247.63 |
| <b>4.3</b> | CPP6-3                    | WVPTLK                                       | 741.94                | 1.21 | -0.20 | 267.86 |
| <b>6.1</b> | Gemcitabine-C2-<br>CPP6-1 | dFdC-(CH <sub>2</sub> ) <sub>2</sub> -WKLPVM | 1117.28               | 2.51 | 1.51  | 364.39 |
| <b>6.2</b> | Gemcitabine-C2-<br>CPP6-2 | dFdC-(CH <sub>2</sub> ) <sub>2</sub> -KLPVMW | 1117.28               | 2.40 | 1.24  | 364.39 |
| <b>6.3</b> | Gemcitabine-C2-<br>CPP6-3 | dFdC-(CH <sub>2</sub> ) <sub>2</sub> -WVPTLK | 1087.19               | 1.84 | 0.69  | 384.62 |
